# Supplementary material
Source: PubMed Central journal article supplement (PMC3870148)
Supplement: NIHMS468874-supplement-1.pdf [file NIHMS468874-supplement-1.pdf]

# **Supplemental Material**

## **SUPPLEMENTAL METHODS**

**Derivation of patient and disease-specific hiPSCs.** Patient-specific hiPSCs were generated from dermal fibroblasts as previously reported using lentivirus on Matrigel-coated tissue culture dishes (BD Biosciences, San Jose, CA) with mTESR-1 hESC Growth Medium (STEMCELL Technologies, Vancouver, Canada)<sup>1</sup>.

**HEK293 cell culture.** HEK293 cells stably expressing hERG were grown in Minimum Essential Medium (MEM) supplemented with 10% heat inactivated FBS, non-essential amino acids (1×), Sodium Pyruvate (1×), Penicillin-Streptomycin (100 U/ml and 100 U/ml), and G418 (500 µg/ml) (Gibco). In preparation for electrophysiological recordings, cells were trypsinized, washed in standard MEM media, and plated onto coverslips 1-2 days before recordings.

**Dissociation of beating EBs into single hESC-CMs and hiPSC-CMs for electrophysiological recordings.** Dissociation of beating EBs was conducted as previously described<sup>2</sup>. Briefly, spontaneously contracting EBs were mechanically collected, enzymatically dispersed into single cells and attached to Matrigel-coated glass coverslips (CS-22/40, Warner, Hamden, CT). 5-10 days after plating, stably contracting single hESC-CMs/hiPSC-CMs were subjected to patch clamping as described below.

**Quantitative real-time PCR.** Total mRNAs were isolated from hESC-CMs, control iPSC-CMs, disease-specific hiPSC-CMs, HEK293 cells stably expressing hERG (hERG-HEK293),

blank HEK293, and human left ventricular tissue (LV) using the Qiagen RNeasy Mini kit. 1  $\mu$ g of RNA was used to synthesize cDNA using the *Superscript II* First-Strand cDNA synthesis kit (Invitrogen). 0.25  $\mu$ L of the reaction was used to quantify gene expression by qPCR using *TaqMan* Universal PCR *Master Mix*. Expression values were normalized to the average expression of housekeeping gene GAPDH.

**Teratoma formation.**  $1 \times 10^6$  undifferentiated hiPSCs were suspended in 10  $\mu$ L Matrigel (BD Biosciences) and delivered by a 28.5 gauge syringe to the renal capsule of 8 week old SCID Beige mice. Eight weeks after cell delivery, tumors were explanted for hematoxylin and eosin (H&E) staining.

**Immunofluorescence staining.** Immunofluorescence was performed using appropriate primary antibodies and AlexaFluor conjugated secondary antibodies (Invitrogen) as previously described <sup>3</sup>. The primary antibodies used in this study were Tra-1-60, Tra-1-81, SSEA-4, Oct 4, Nanog (Santa Cruz, CA), Sox2 (Biolegend, San Diego, CA), sarcomeric  $\alpha$ -actinin (Sigma, St. Louis, MO), cTnT (Thermo Scientific Barrington, IL), Myosin light chain 2a (MLC2a), and Myosin light chain 2v (MLC2v) (Synaptic Systems, Goettingen, Germany).

**Electrophysiological recordings of HEK293 cells.** Traditional whole-cell voltage-clamp recording was performed at room temperature to record the hERG currents in HEK293 cells with an EPC-10 amplifier (HEKA, Germany). The pipette solution contained 130 mM KCl, 1 mM MgCl<sub>2</sub>, 10 mM HEPES, 5 mM Mg-ATP, 5 mM EGTA (pH 7.25 with KOH at 25°C); the

external solution contains 137 mM NaCl, 4 mM KCl, 1 mM MgCl<sub>2</sub>, 10 mM glucose, 1.8 mM CaCl<sub>2</sub>, and 10 mM HEPES (pH 7.4 with NaOH at 25°C). Capacitance and 60–80% series resistance were routinely compensated. The cells were voltage clamped at a holding potential of -80 mV. The hERG current was activated by depolarizing at +20 mV for 2 sec, after which the current was taken back to -50 mV for 2 sec to remove the inactivation and observe deactivation of the tail current. The first step at -50 mV was used as a baseline for measuring the tail current peak amplitude. After achieving whole-cell configuration, the cells were monitored for 90 sec to assess stability and washed with external solution for 60 sec. The voltage protocol described above was then applied to the cells every 20 sec throughout the whole procedure. Only stable cells with recording parameters above threshold were allowed to enter the drug treatment phase. External solution containing 0.1% DMSO (vehicle) was applied to cells to establish the baseline. After allowing the current to stabilize for 3 min, single cells were treated with drug compound solution as defined in the Methods section of the manuscript. Recordings of hERG current were maintained until the compound's effect reached a steady state or for a maximum of 6 min. Washout with external solution was performed until the recovery of the current reached a steady state.

**Electrophysiological recordings of hESC-CMs and hiPSC-CMs.** To record spontaneous action potential recordings from hESC-CMs and hiPSC-CMs, a Giga-Ohm seal was achieved under the voltage-clamp mode and the APs were collected under the current-clamp configuration using an EPC-10 amplifier (HEKA, Germany). Contracting embryoid bodies (EBs) were mechanically isolated, enzymatically dispersed into single cells and attached to

0.1% gelatin-coated glass coverslips (Warner Instruments, CS-8R, USA). While recordings, the coverslips containing plated cardiomyocytes were transferred to a RC-26C recording chamber (Warner, USA) mounted on to the stage of an inverted microscope (Nikon, Tis, Japan). The glass pipettes were prepared using thin-wall borosilicate glass (A-M System, Catalog # 617000, USA) using a micropipette puller (Sutter Instrument, P-97, USA), polished using a microforge (Narishige, MF830, Japan) and had resistances between 2-4 M $\Omega$ . Extracellular solution perfusion was continuous using a rapid solution exchanger (Biologic, RC-200, USA) with solution exchange requiring  $\sim$ 1 min. Temperature was maintained constantly by a TC-324B heating system (Warner, USA) at 36 - 37  $^{\circ}$ C. Data were acquired using PatchMaster software (HEKA, Germany), digitized at 1.0 kHz and were analyzed using PulseFit (HEKA, Germany), Igor Pro (Wave Metrics), Microcal Origin 6.1 (OringinLab), or Prism 5 (GraphPad). The recordings were conducted in normal Tyrode solution containing 140 mM NaCl, 5.4 mM KCl, 1 mM MgCl<sub>2</sub>, 10 mM glucose, 1.8 mM CaCl<sub>2</sub>, and 10 mM HEPES (pH 7.4 with NaOH at 25 $^{\circ}$ C). The pipette solution contained 120 mM KCl, 1 mM MgCl<sub>2</sub>, 10 mM HEPES, 3 mM Mg-ATP, and 10 mM EGTA (pH 7.2 with KOH at 25 $^{\circ}$ C). For recordings on differentiated ventricular-like cardiomyocytes, the maximum diastolic potential (MDP) of single cardiomyocytes varied from  $-70$  mV to  $-50$  mV, action potential amplitude (APA) was greater than 90 mV, and action potential duration (APD)<sub>90</sub>/APD<sub>50</sub> was less than 1.20. Only those cardiomyocytes satisfying the above criteria were considered to be ventricular-like cardiomyocytes and selected for drug screening. Escalating doses were sequentially applied to isolated single hESC-CMs and hiPSC-CMs. Steady-state was obtained for 3 min before application of higher doses. The average responses of 20 APs were analyzed

for each dose. The steady-state before and after application were used to calculate the percentage of APD<sub>90</sub> prolongation/shortening at each dose. Dose-response data were fit to Hill equation. IC<sub>50</sub> here is defined the half maximal inhibitory concentration to block the hERG peak tail current or significantly prolong the APD<sub>90</sub>. Significant APD<sub>90</sub> prolongation is defined as a >10% change in APD<sub>90</sub> at the indicated concentration <sup>4</sup>.

## **SUPPLEMENTAL FIGURE LEGENDS**

### **Supplemental Figure 1. Sequence analysis of patient-specific LQT, HCM, and DCM**

**hiPSCs for KCNQ1, MYH7, and TNNT mutant loci. (a)** Schematic pedigrees of the LQT, HCM and DCM families used in this study. Squares represent male family members and circles represent female family members. Solid and open symbols indicate presence and absence of the familial LQT, HCM, and DCM mutations, respectively. For the LQT cohort, hiPSCs were derived from three patients carrying the G269S mutation in KCNQ1 (II-1, II-2, and III-1) and one family-matched healthy individual (II-3). For the HCM cohort, hiPSCs were derived from three patients carrying the R663H mutation in MYH7 (I-1, II-1, and II-3) and one family matched control (II-2). For the DCM cohort, hiPSCs were derived from three patients carrying the R173W mutation in TNNT2 (I-1, I-2, and II-1) and one family-matched control (II-2). **(b)** Confirmation of the G269S missense mutation on exon 6 of the KCNQ1 gene in LQT patients (3 patient lines) by PCR and sequence analysis. **(c)** Confirmation of the R663H missense mutation on exon 18 of the MYH7 gene in HCM patients (3 patient lines) by PCR and sequence analysis. **(d)** Confirmation of the R173W missense mutation on exon 12 of the TNNT gene in DCM patients (3 patient lines) by PCR and sequence analysis.

### **Supplemental Figure 2. Transgene silencing in patient-specific hiPSCs.**

Quantitative PCR ratios for total versus endogenous expression of the reprogramming factors OCT4, SOX2, MYC and KLF4 in hESCs, control hiPSCs, LQT hiPSCs, HCM hiPSCs, and DCM hiPSCs.

### **Supplemental Figure 3. Pluripotency of patient-specific hiPSCs as demonstrated by**

**teratoma formation.** Representative H&E staining of a solid teratoma transplanted under the

renal capsule of an immunodeficient mouse show presence of cellular derivatives belonging to 3 germ layers including brain (ectoderm), skeletal muscle (mesoderm), and gut epithelium (endoderm).

**Supplemental Figure 4. Cardiac differentiation efficiencies of patient-specific hiPSC lines.** **(a)** Cardiac differentiation efficiency of control, LQT, HCM, and DCM hiPSC-CMs was measured by the % of beating EBs (n=50 per line, 3 lines per cohort). **(b)** Quantification of TNNT2-positive cardiomyocytes derived from control, LQT, HCM, and DCM hiPSC lines (n=50 per line, 3 lines per cohort).

**Supplemental Figure 5. Capacitance measurements for patient-specific hiPSC-CM lines.** Quantification of capacitance values for single hESC-CMs, control hiPSC-CMs, LQT hiPSC-CMs, HCM hiPSC-CMs, and DCM hiPSC-CMs by patch clamp recordings (n=45-60, 3 lines per cohort). \*\* indicates  $P < 0.01$ , as compared to control hiPSC-CMs.

**Supplemental Figure 6. Electrophysiological profiling of disease-specific hiPSC-CMs.** **(a)** Quantification of nodal-like, atrial-like, and ventricular-like  $APD_{90}/APD_{50}$  in hESC-CMs, control hiPSC-CMs, LQT hiPSC-CMs, HCM hiPSC-CMs, and DCM hiPSC-CMs. **(b)** Quantification of nodal-like, atrial-like, and ventricular-like  $V_{max}$  in hESC-CMs, control hiPSC-CMs, LQT hiPSC-CMs, HCM hiPSC-CMs, and DCM hiPSC-CMs. Please note the smaller  $V_{max}$  values for nodal-like cardiomyocytes. **(c)** Quantification of nodal-like, atrial-like, and ventricular-like MDP in hESC-CMs, control hiPSC-CMs, LQT hiPSC-CMs, HCM



hiPSC-CMs, and DCM hiPSC-CMs. (d) Quantification of nodal-like, atrial-like, and ventricular-like overshoot in hESC-CMs, control hiPSC-CMs, LQT hiPSC-CMs, HCM hiPSC-CMs, and DCM hiPSC-CMs.

**Supplemental Figure 7. Inter-comparison of electrophysiological baselines for family-matched control hiPSC-CMs belonging to LQT, HCM, and DCM cohorts. (a-c) APD<sub>50</sub>, APD<sub>70</sub>, and APD<sub>90</sub> for each of the three myocyte subtypes (nodal-, atrial- and ventricular-like) in control hiPSC-CMs derived from healthy individuals belonging to LQT, HCM and DCM family cohorts. (d) Percentage of DADs and EADs observed in control hiPSC-CM lines derived from healthy individuals belonging to LQT, HCM and DCM family cohorts.**

**Supplemental Figure 8. Stability of HEK293 hERG tail currents.** Peak tail currents were measured for a representative HEK-293 cell expressing hERG. Treatment with 0.1% DMSO (vehicle control) had no effect on hERG tail currents over an observation period of 8,000 seconds (n=3). The arrowhead indicates the time point at which 0.1% DMSO added.

**Supplemental Figure 9. Comparison of APD<sub>90</sub>-dose relationship between hESC-CMs and control hiPSC-CMs for verapamil and alfuzosin. (a) Upper panel: dose-response relationship of the steady-state APD<sub>90</sub> prolongation for hESC-CMs and control hiPSC-CMs following treatment with verapamil. Data were fit by the Hill function. Lower panel: IC<sub>50</sub> values of APD<sub>90</sub> prolongation for hESC-CMs and control hiPSC-CMs following treatment with verapamil (n=9, 3 lines). (b) Upper panel: dose-response relationship of the steady-state**

APD<sub>90</sub> for hESC-CMs and control hiPSC-CMs following treatment with alfuzosin. Data were fit by the Hill function. Lower panel: IC<sub>50</sub> values of APD<sub>90</sub> prolongation for hESC-CMs and control hiPSC-CMs following treatment with alfuzosin (n=9, 3 lines).

**Supplemental Figure 10. Electrophysiological stability of hiPSC-CM APs during vehicle treatment.** Control hiPSC-CMs were treated with 0.1% DMSO (vehicle control) for 10 minutes. Representative traces are shown at time 0, 1 minute, 2 minutes, 5 minutes, 8 minutes, and 10 minutes (black, red, blue, purple, magenta and cyan, respectively) (n=6, 3 lines).

**Supplemental Figure 11. Concentration-dependent block of hERG by cisapride in hERG expressing HEK293 cells.** (a) Representative time course for treatment of a hERG expressing HEK293 cell at the following concentrations of cisapride: 1 nM, 10 nM, 30 nM, 100 nM, 300 nM, and 1  $\mu$ M. (b) Representative traces showing the effect of cisapride on blockade of hERG current at doses of 0 nM, 1 nM, 10 nM, 30 nM, 100 nM, 300 nM, and 1  $\mu$ M (black, red, blue, purple, magenta, cyan and green traces, respectively). Dose-dependent inhibition of hERG current was clearly observed. (c) Dose-response relationship showing steady-state inhibition of hERG by cisapride. IC<sub>50</sub> was calculated by fitting a Hill function to the data constrained to 100% inhibition. IC<sub>50</sub> for cisapride was  $0.032 \pm 0.003$   $\mu$ M (n=5 for each dose).

**Supplemental Figure 12. Inter-comparison of cisapride and nicorandil-induced cardiotoxicity for family-matched control hiPSC-CMs belonging to LQT, HCM, and DCM cohorts.** (a) Dose-response relationship showing steady-state prolongation of APD<sub>90</sub> by cisapride for family-matched control hiPSC-CM lines derived from healthy subjects belonging to LQT, HCM and DCM cohorts. (b) IC<sub>50</sub> values of APD<sub>90</sub> prolongation of cisapride for control hiPSC-CM lines derived from LQT, HCM and DCM family cohorts. (c) Dose-response relationship showing steady-state shortening of APD<sub>90</sub> by nicorandil for control hiPSC-CMs derived from LQT, HCM and DCM family cohorts. (d) IC<sub>50</sub> values of nicorandil-induced APD<sub>90</sub> shortening for control hiPSC-CM lines derived from LQT, HCM, and DCM family cohorts.

**Supplemental Figure 13. Schematic for personalized approach to determination of drug-induced cardiotoxicity.** Patient-specific somatic cells are reprogrammed to pluripotency by defined factors, differentiated to cardiac lineages and screened for drug response. Dosages and patient-specific toxicities can be calibrated based upon *in vitro* readouts of cardiotoxicity such as APD prolongation or induction of EADs/DADs at the single cell level.

**Supplemental Video 1.** Representative video of beating EBs generated by cardiac differentiation in suspension.

**Supplemental Video 2.** Representative video of the contracting cardiomyocytes dissociated from beating EBs.

## SUPPLEMENTAL REFERENCES

1. Sun N, Yazawa M, Liu J, Han L, Sanchez-Freire V, Abilez OJ, Navarrete EG, Hu S, Wang L, Lee A, Pavlovic A, Lin S, Chen R, Hajjar RJ, Snyder MP, Dolmetsch RE, Butte MJ, Ashley EA, Longaker MT, Robbins RC, Wu JC. Patient-specific induced pluripotent stem cells as a model for familial dilated cardiomyopathy. *Science Translational Medicine*. 2012;4:130ra147
2. Yang L, Soonpaa MH, Adler ED, Roepke TK, Kattman SJ, Kennedy M, Henckaerts E, Bonham K, Abbott GW, Linden RM, Field LJ, Keller GM. Human cardiovascular progenitor cells develop from a kdr+ embryonic-stem-cell-derived population. *Nature*. 2008;453:524-528
3. Jia F, Wilson KD, Sun N, Gupta DM, Huang M, Li Z, Panetta NJ, Chen ZY, Robbins RC, Kay MA, Longaker MT, Wu JC. A nonviral minicircle vector for deriving human ips cells. *Nat Methods*. 2010;7:197-199
4. Redfern WS, Carlsson L, Davis AS, Lynch WG, MacKenzie I, Palethorpe S, Siegl PK, Strang I, Sullivan AT, Wallis R, Camm AJ, Hammond TG. Relationships between preclinical cardiac electrophysiology, clinical qt interval prolongation and torsade de pointes for a broad range of drugs: Evidence for a provisional safety margin in drug development. *Cardiovascular Research*. 2003;58:32-45

**a** **LQT family**  
**KCNQ1, G269S**

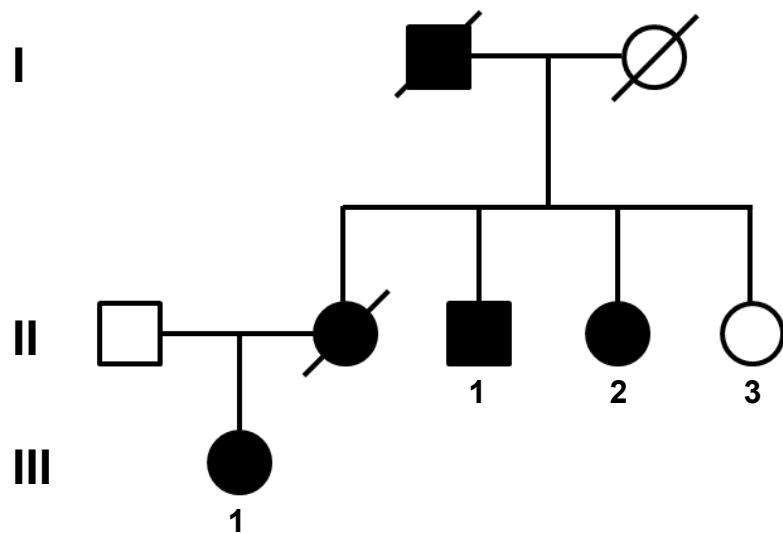

**HCM family**  
**MYH7, R663H**

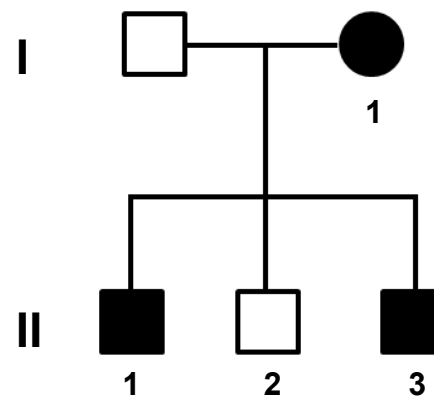

**DCM family**  
**TNNT2, R173W**

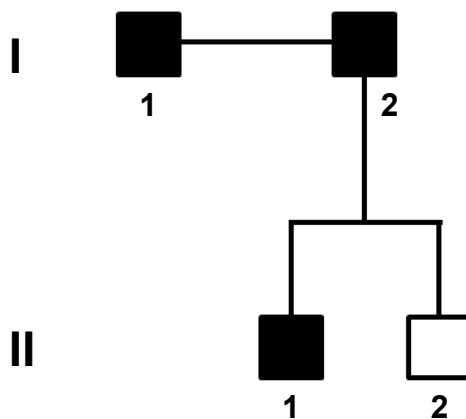

**Supplemental Figure 1**

**b****LQT KCNQ1 G269S G-A**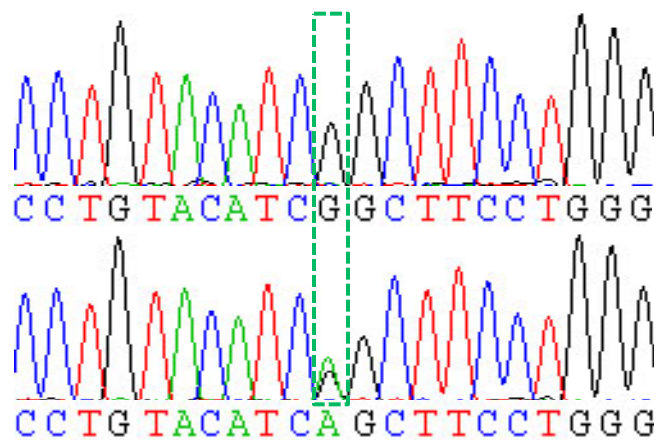**c****HCM MYH7 R663H G-A**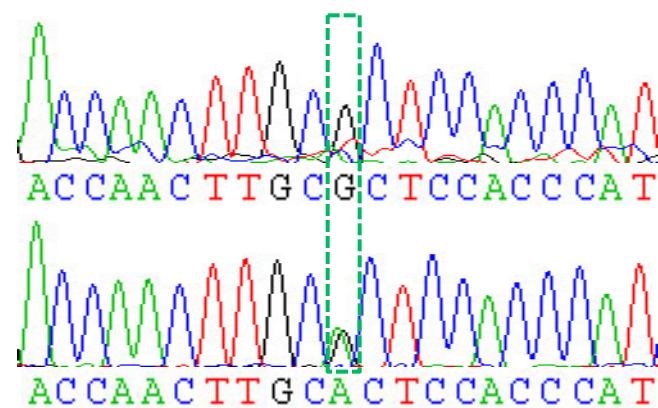**d****DCM TNNT2 R173W C-T**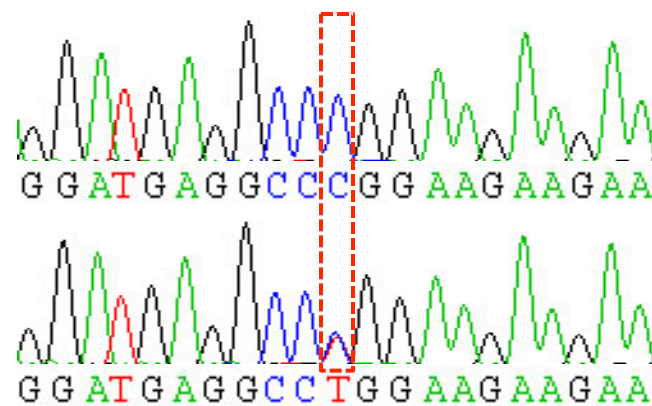

Supplemental Figure 1

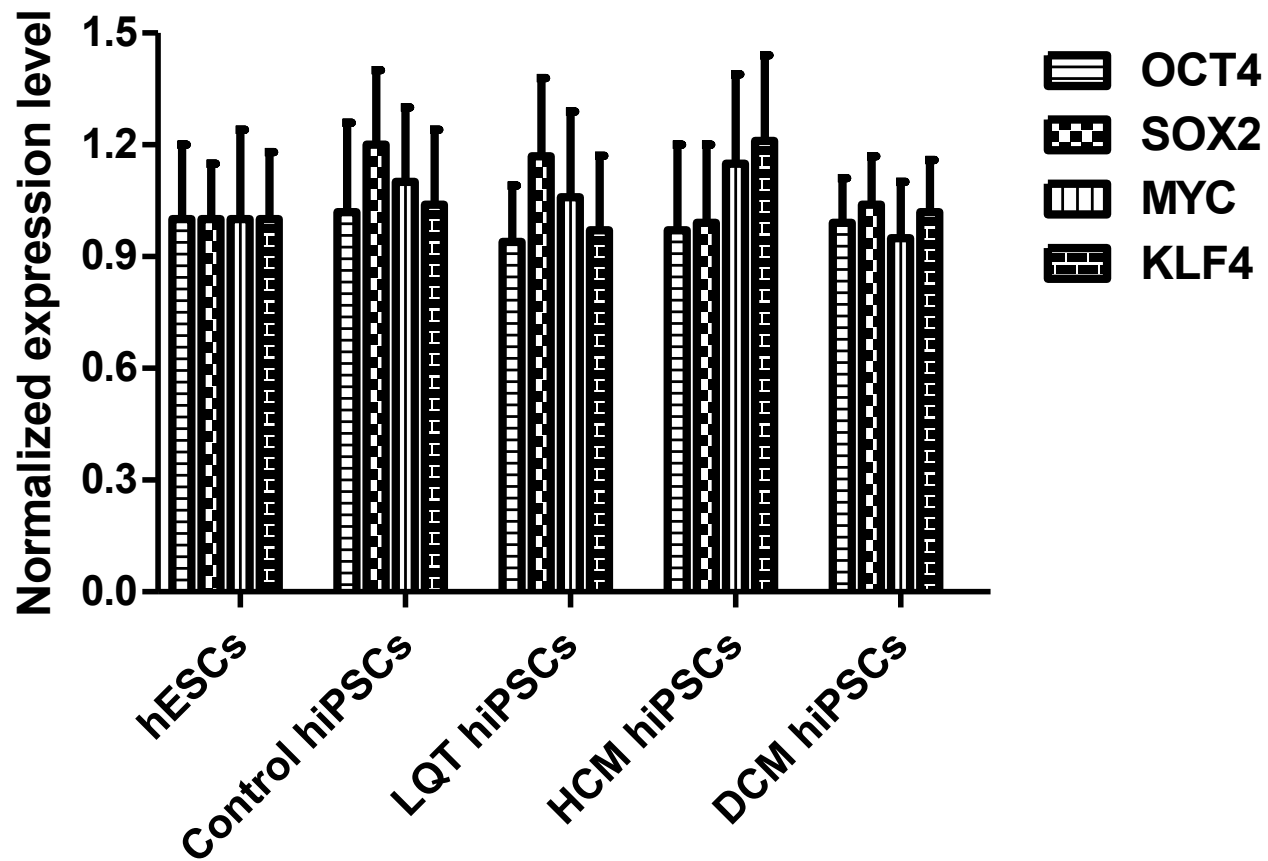

Supplemental Figure 2

**Skeletal muscle  
(Mesodermal)**

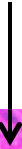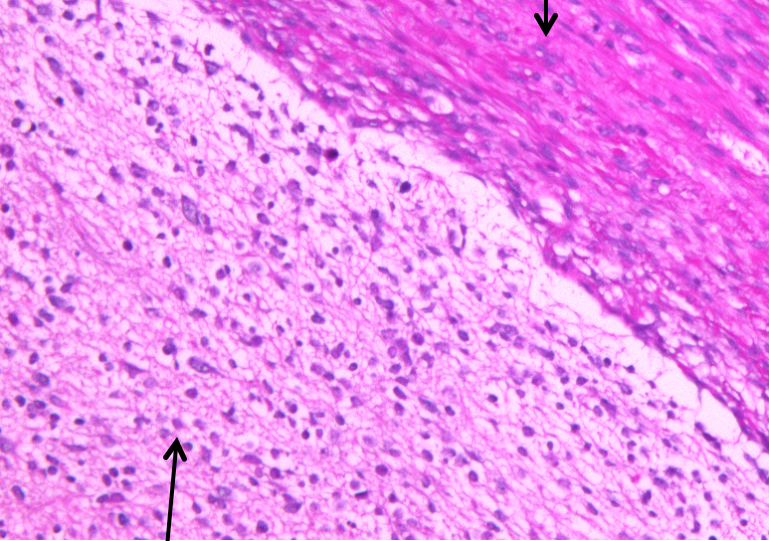

**Neural element  
(Ectodermal)**

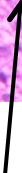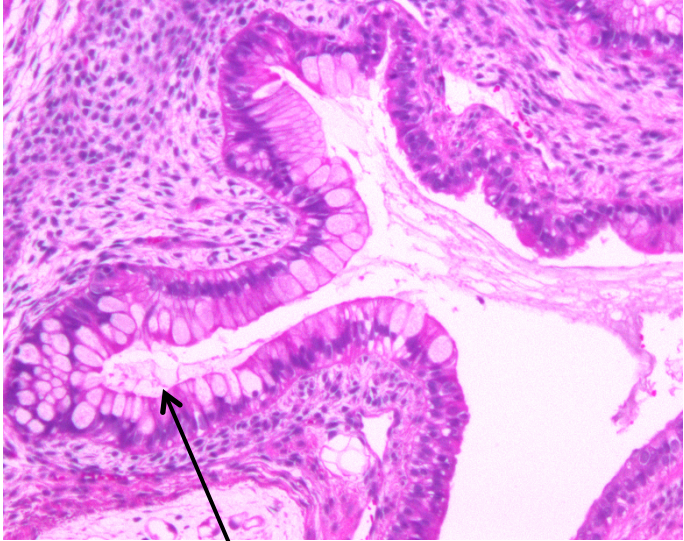

**Gut epithelium  
(Endodermal)**

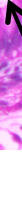

**Supplemental Figure 3**



**a**

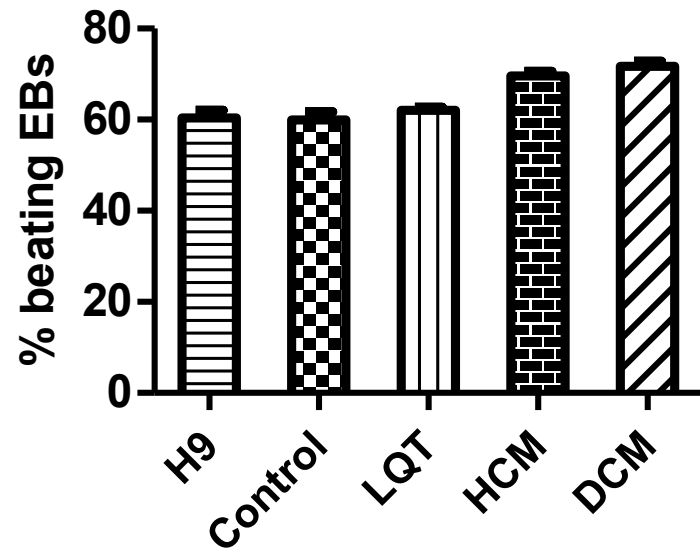

**b**

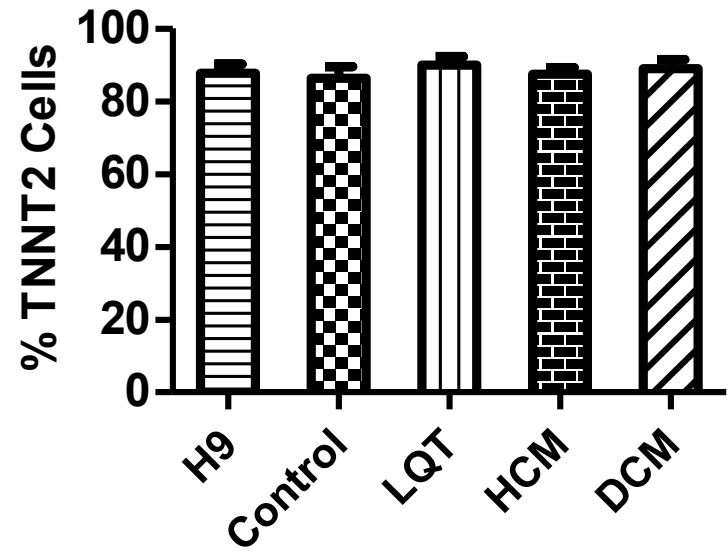

Supplemental Figure 4

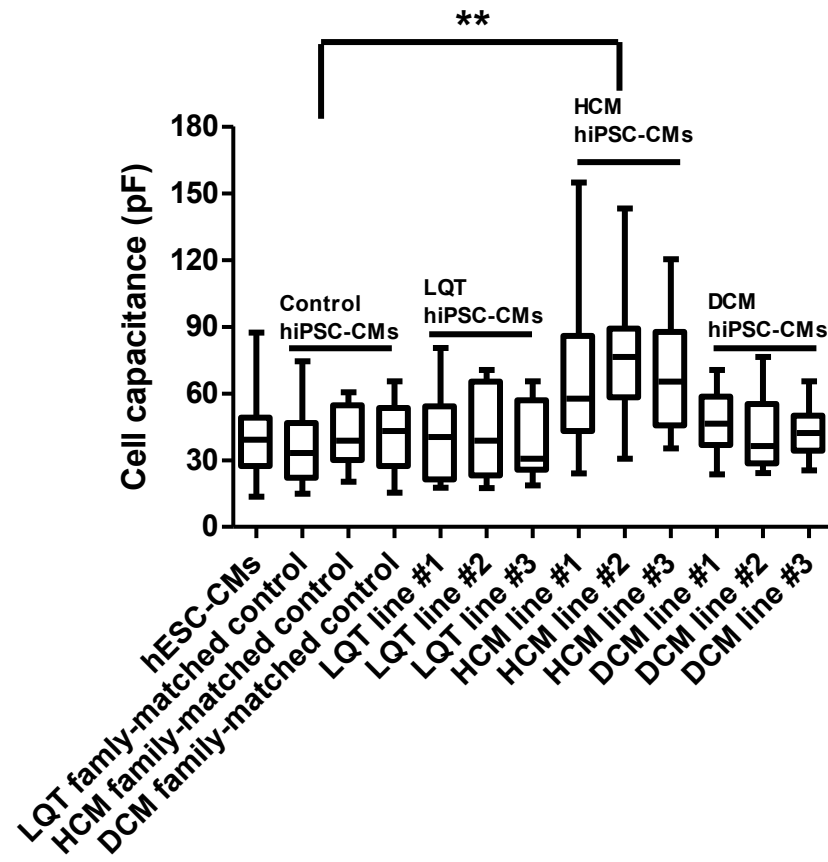

Supplemental Figure 5

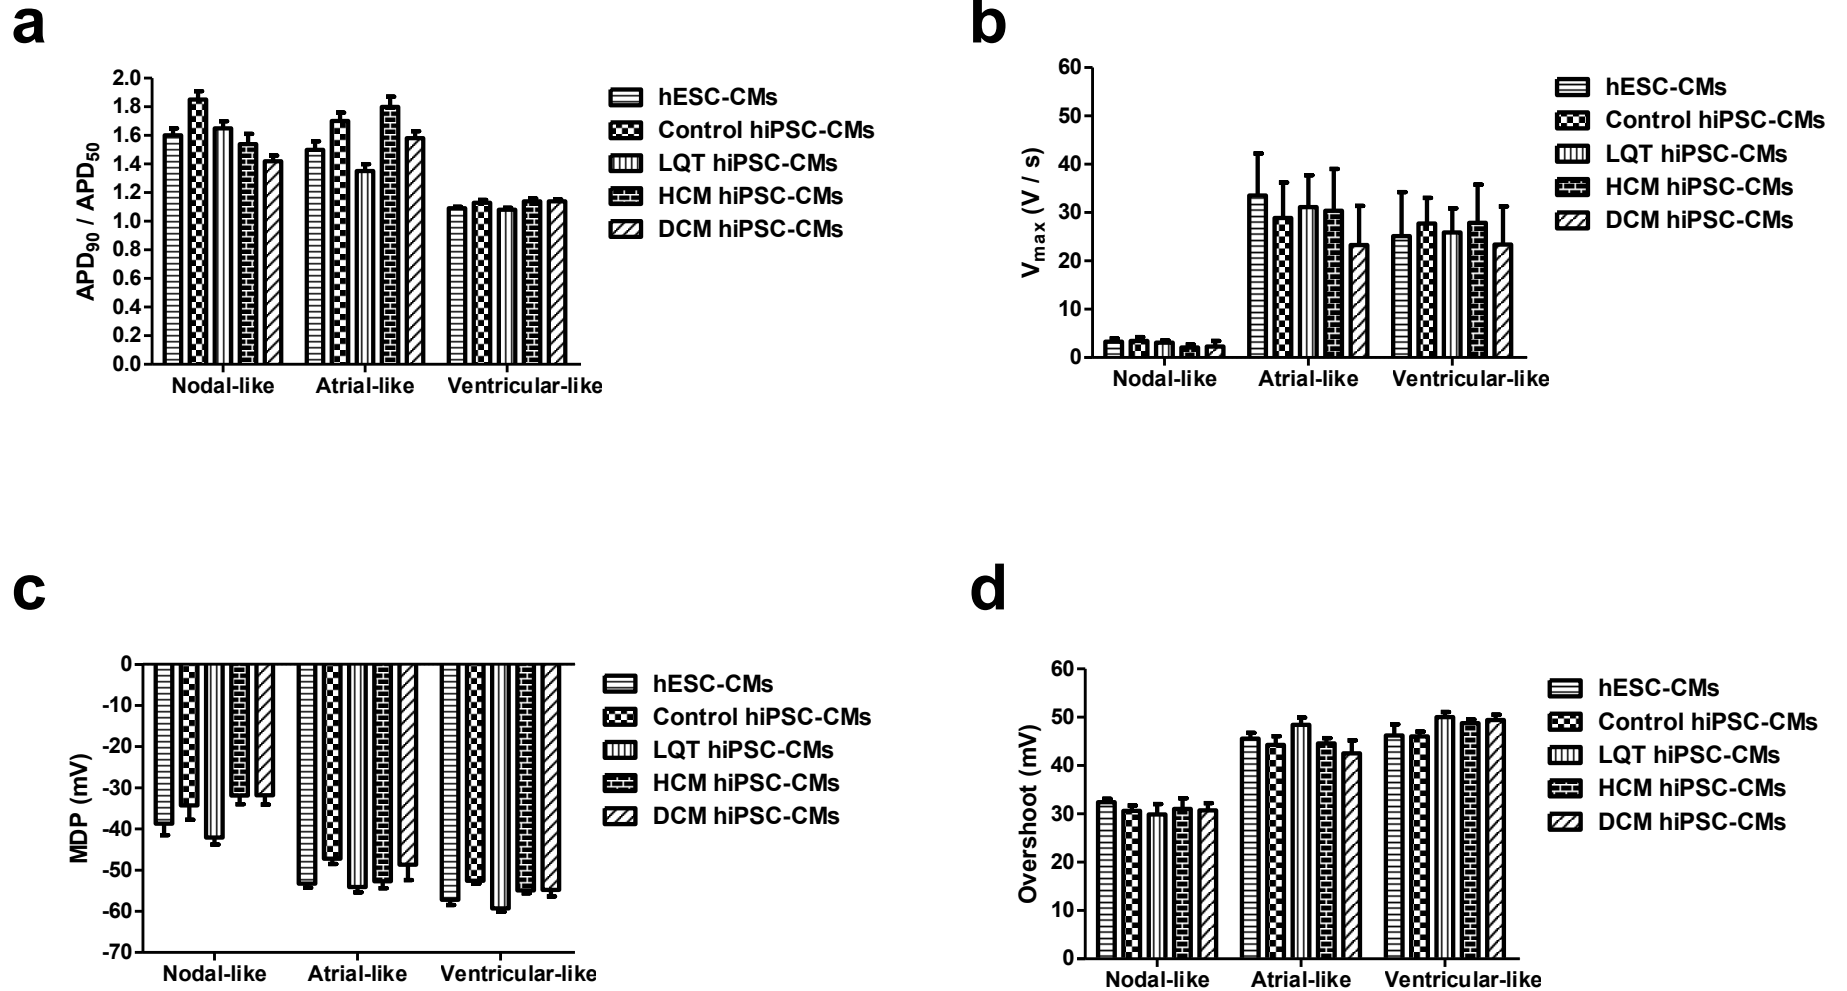

Supplemental Figure 6

**a**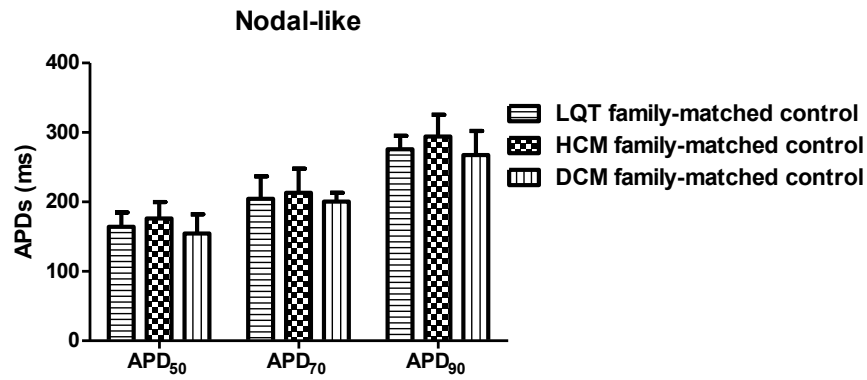**b**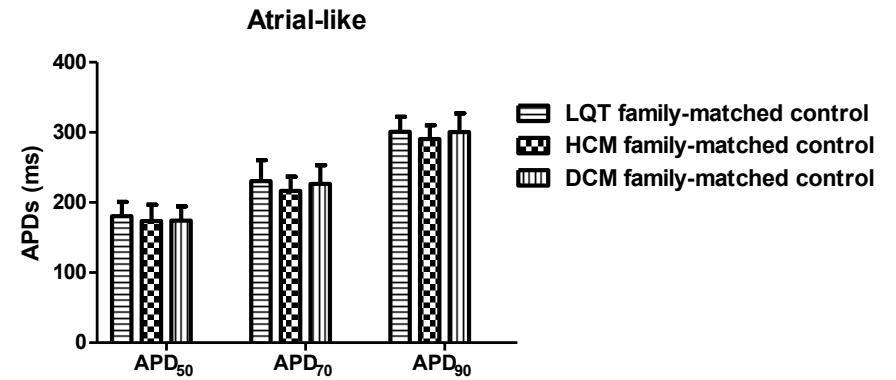**c**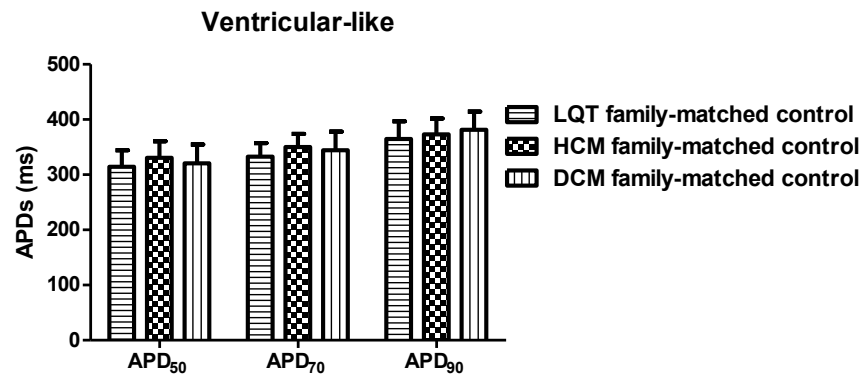**d**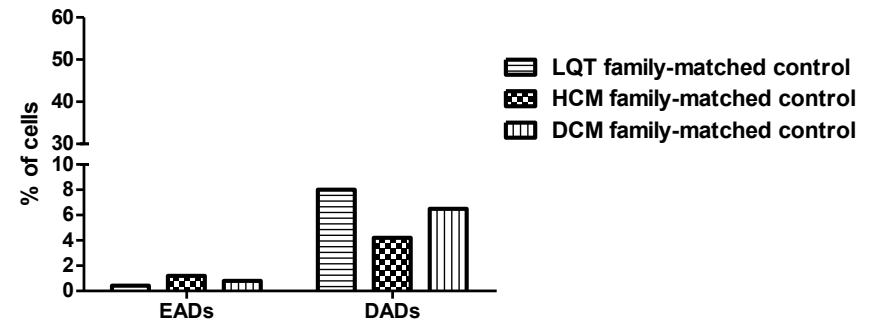**Supplemental Figure 7**

## Vehicle Stability of hERG assay

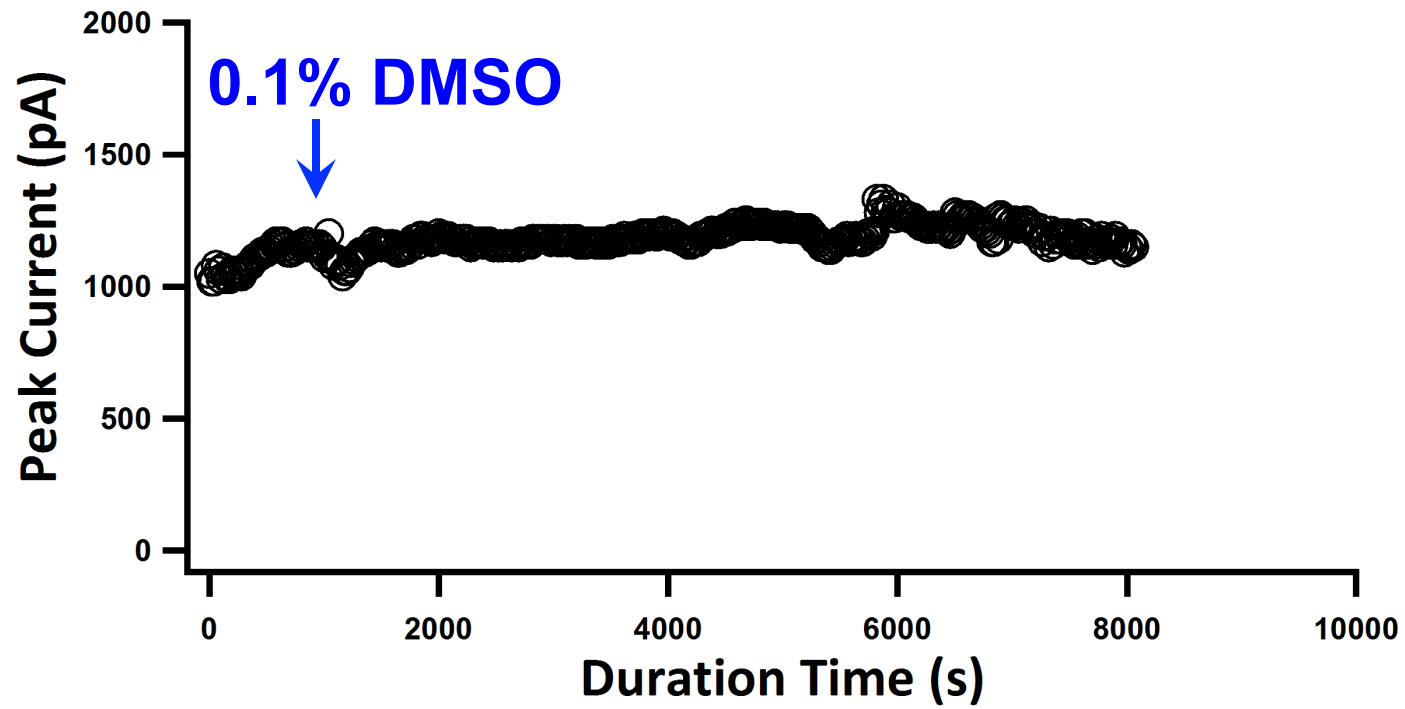

Supplemental Figure 8

**a** Verapamil

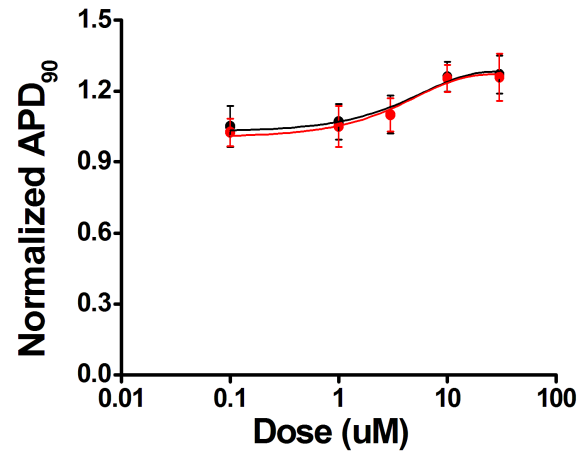

**b** Alfuzosin

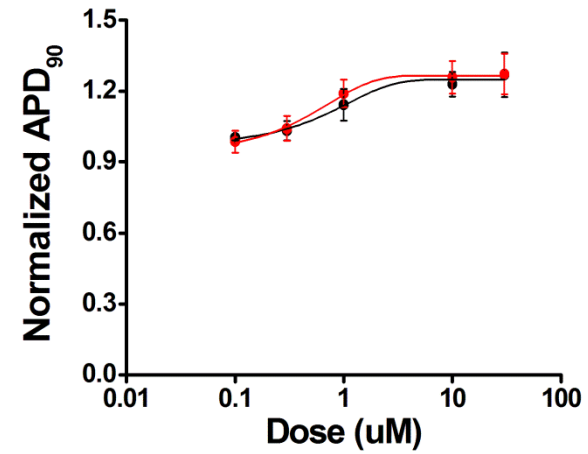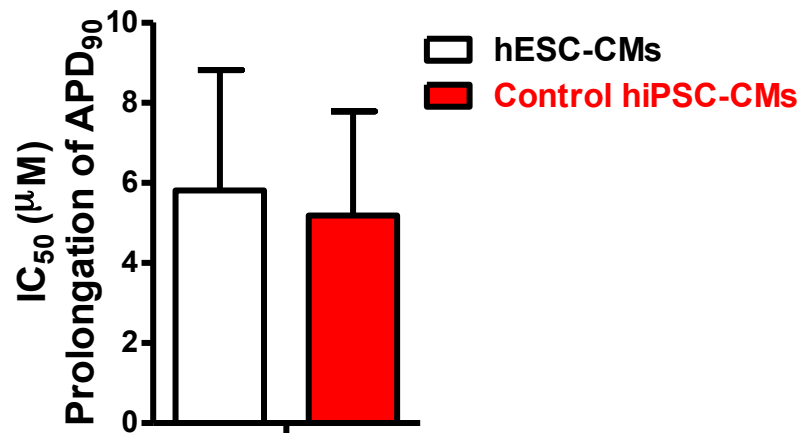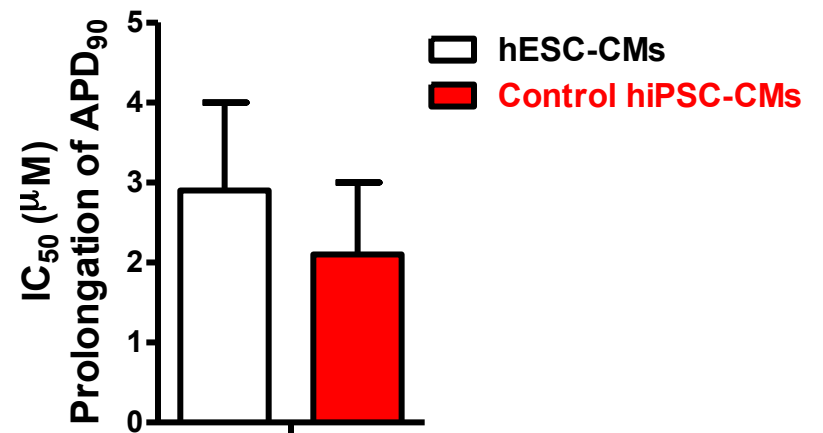

Supplemental Figure 9

## Vehicle Stability of AP/hiPSC-CM assay

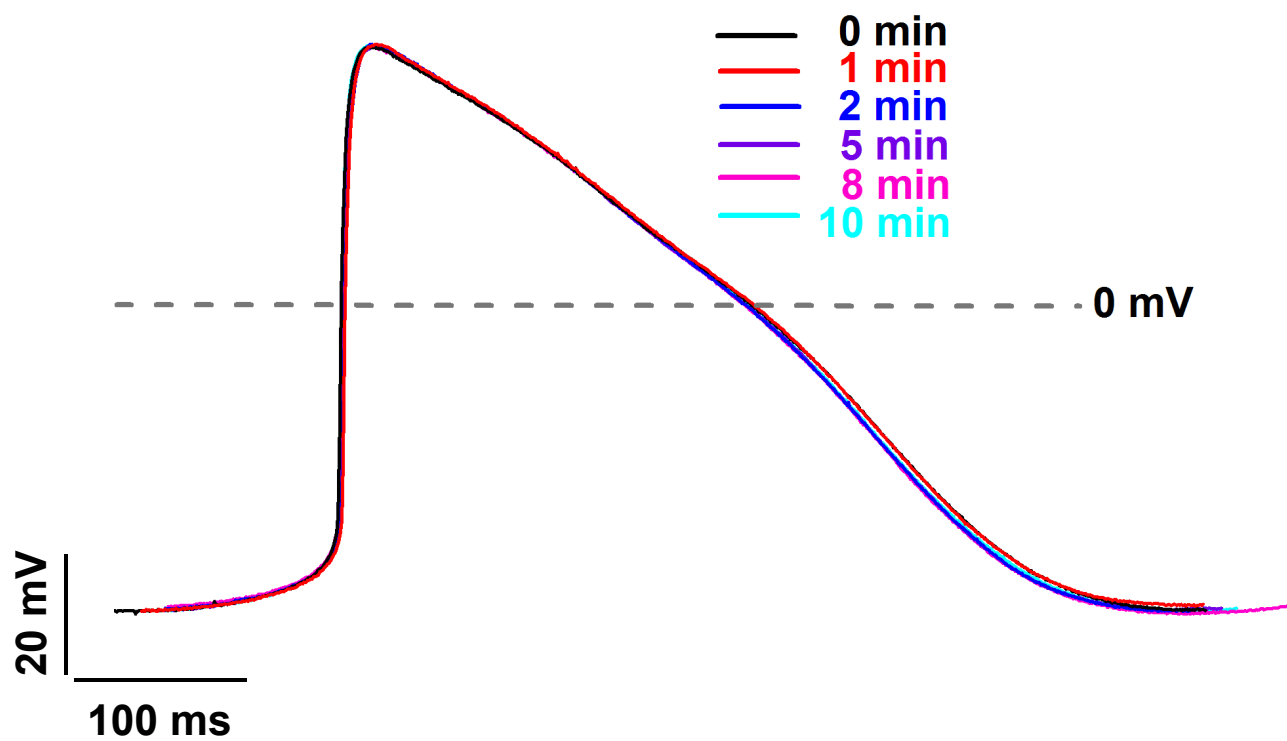

Supplemental Figure 10

**a**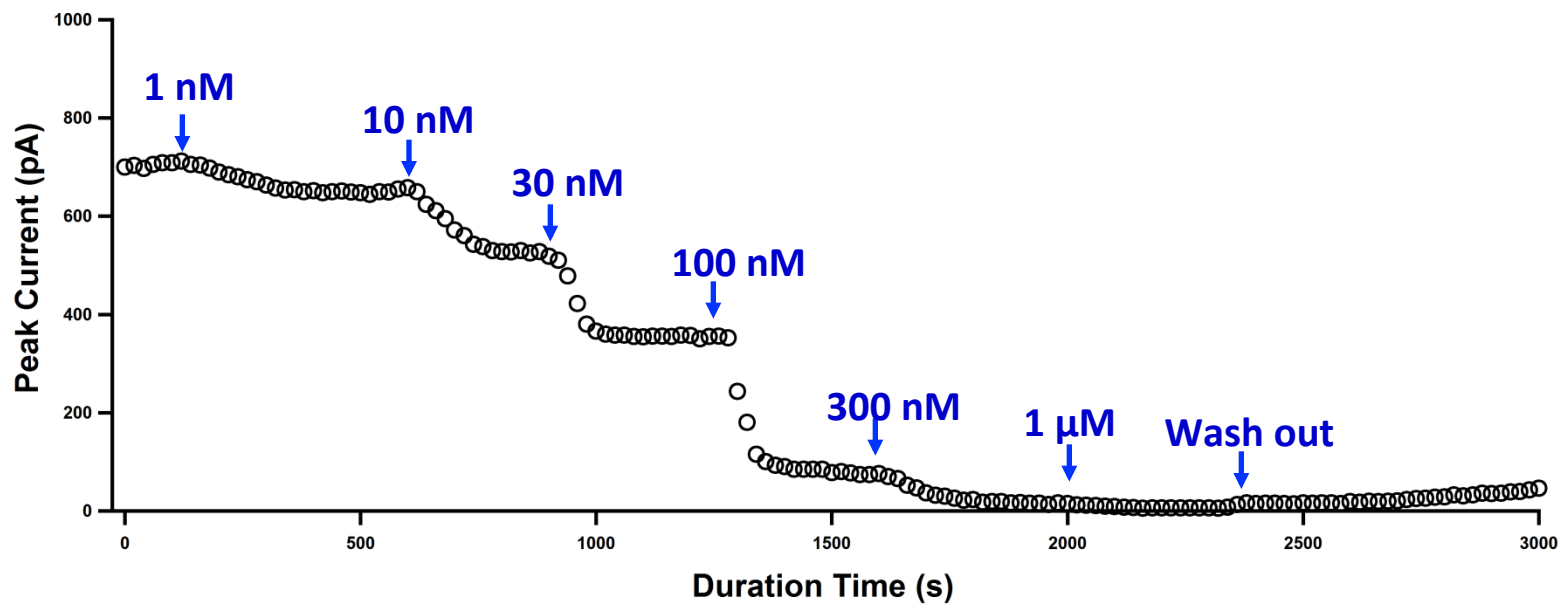**b**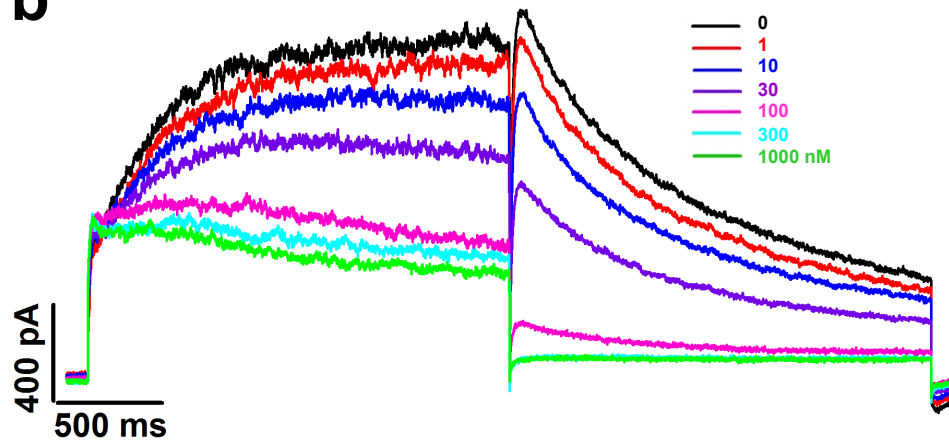**c**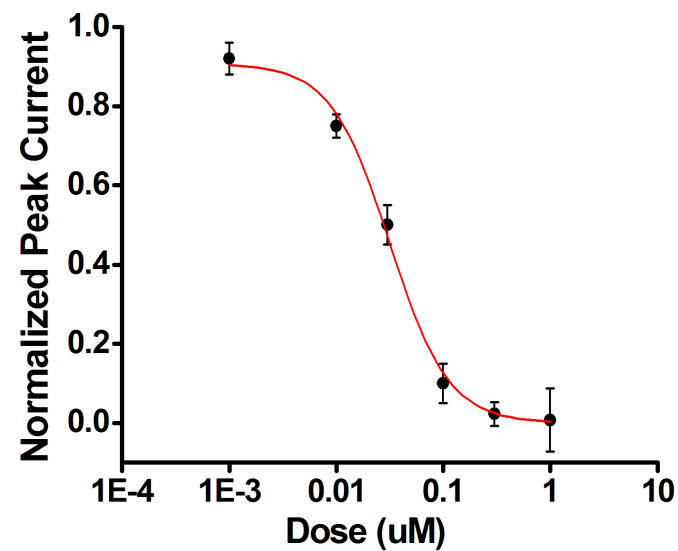**Supplemental Figure 11**



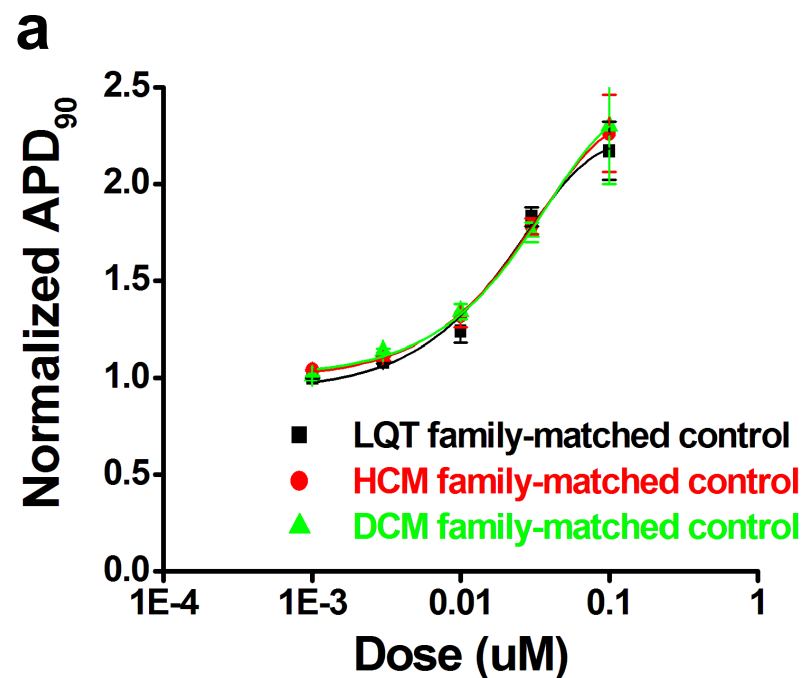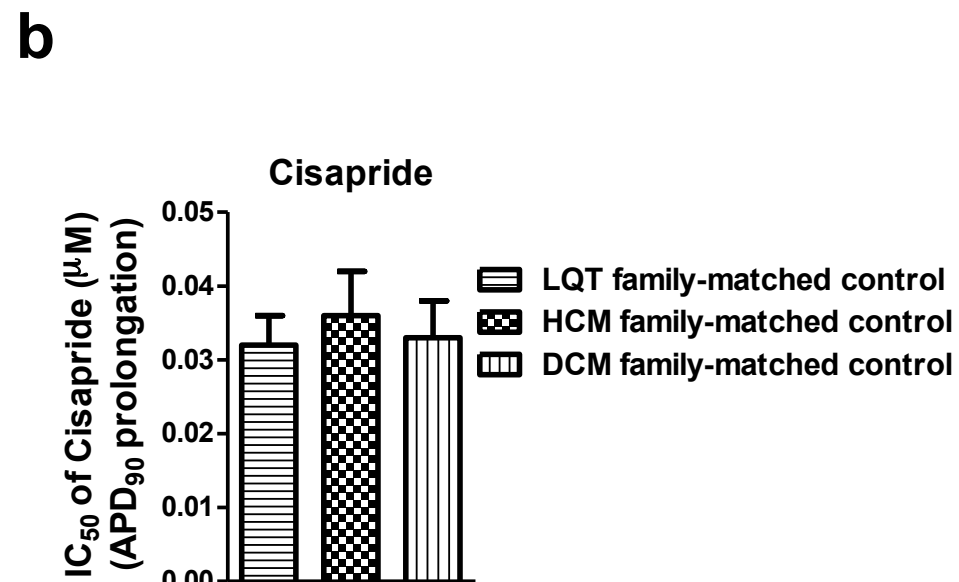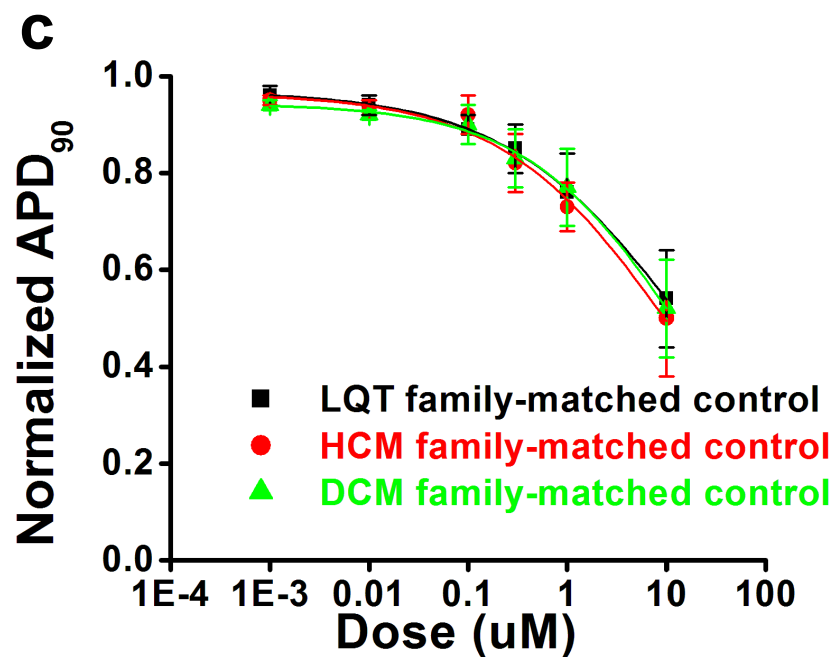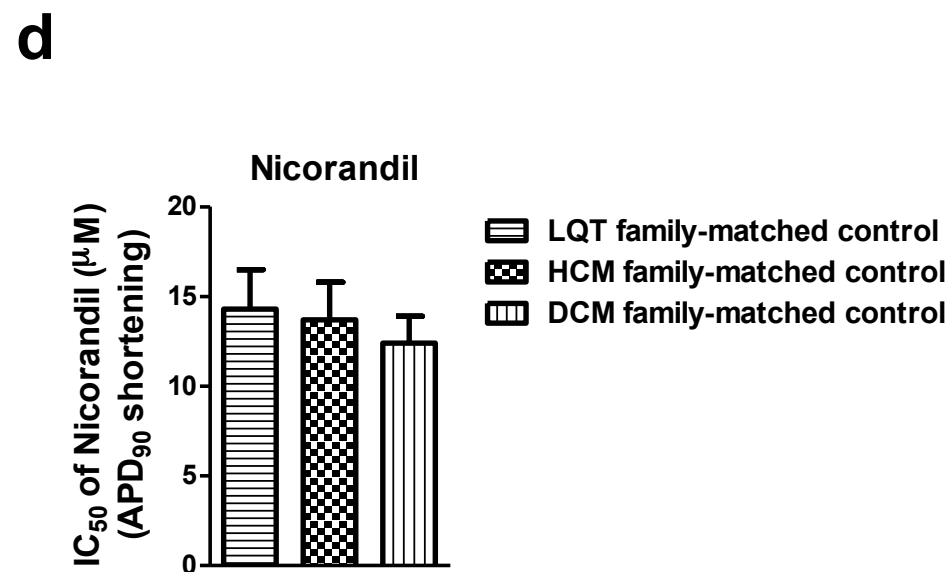

Supplemental Figure 12

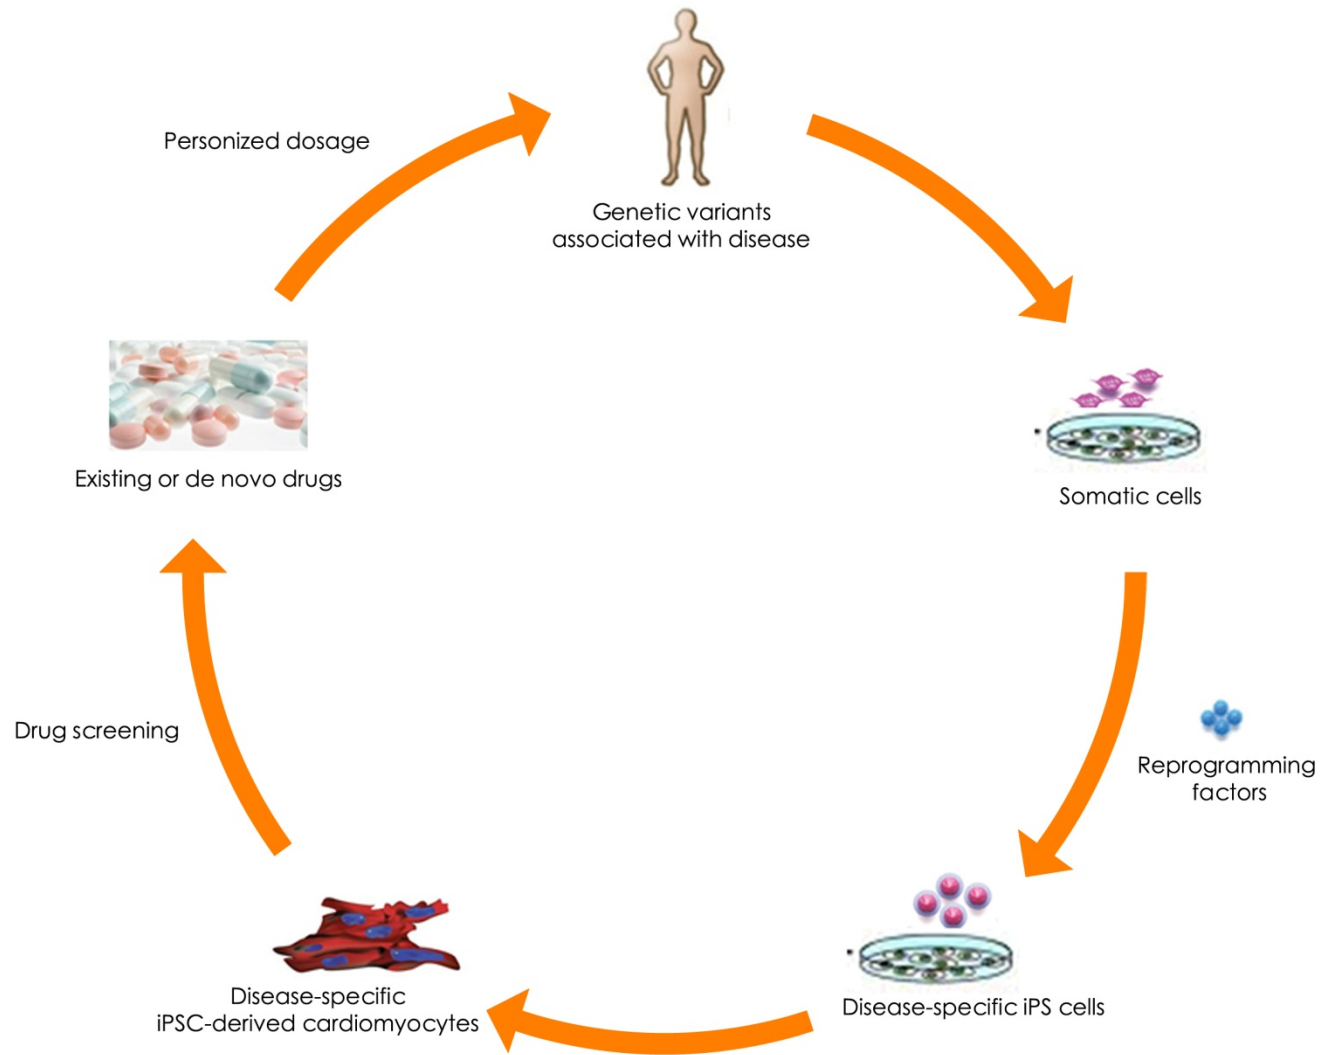

**Supplemental Figure 13**

**Supplemental Table 1. Panel of hiPSCs from cardiovascular disease-specific patients and healthy controls for drug screening**

|                 | Genetic cause  | Number of clones/patient-specific lines |
|-----------------|----------------|-----------------------------------------|
| Human ESCs (H9) | None           | 1                                       |
| Control hiPSCs  | None           | 3                                       |
| LQT hiPSCs      | KCNQ1<br>G269S | 3                                       |
| HCM hiPSCs      | MYH7<br>R663H  | 3                                       |
| DCM hiPSCs      | TNNT2<br>R173W | 3                                       |

**Supplemental Table 2. Panel of LQT, HCM and DCM genes for genetic screening**

| Gene Symbol | Protein Coded                                   | NCBI Ref Gene No. | Cell line/Mutation(s) |         |      |       |       |
|-------------|-------------------------------------------------|-------------------|-----------------------|---------|------|-------|-------|
|             |                                                 |                   | H9                    | Control | LQT  | HCM   | DCM   |
| ACTC1       | alpha-cardiac actin                             | NG_007553         | None                  | None    | None | None  | None  |
| CAV3        | caveolin 3                                      | NG_008797         | None                  | None    | None | None  | None  |
| GLA         | galactosidase alpha                             | NG_007119         | None                  | None    | None | None  | None  |
| LAMP2       | lysosomal-associated membrane protein 2         | NG_007995         | None                  | None    | None | None  | None  |
| MTTG        | mitochondrial transfer RNA glycine              | NC_012920_TRNG    | None                  | None    | None | None  | None  |
| MTTI        | mitochondrial transfer RNA isoleucine           | NC_012920_TRNI    | None                  | None    | None | None  | None  |
| MTTK        | mitochondrial transfer RNA lysine               | NC_012920_TRNK    | None                  | None    | None | None  | None  |
| MTTQ        | mitochondrial transfer RNA glutamine            | NC_012920_TRNQ    | None                  | None    | None | None  | None  |
| MYBPC3      | cardiac myosin-binding protein C                | NG_007667         | None                  | None    | None | None  | None  |
| MYH7        | beta-myosin heavy chain                         | NG_007884         | None                  | None    | None | R663H | None  |
| MYL2        | myosin regulatory light chain 2                 | NG_007554         | None                  | None    | None | None  | None  |
| MYL3        | myosin light chain 3                            | NG_007555         | None                  | None    | None | None  | None  |
| PRKAG2      | 5'-AMP-activated protein kinase subunit gamma-2 | NG_007486         | None                  | None    | None | None  | None  |
| TNNC1       | troponin C                                      | NG_008963         | None                  | None    | None | None  | None  |
| TNNI3       | cardiac muscle troponin I                       | NG_007866         | None                  | None    | None | None  | None  |
| TNNT2       | cardiac muscle troponin T                       | NG_007556         | None                  | None    | None | None  | R173W |
| TPM1        | alpha tropomyosin                               | NG_007553         | None                  | None    | None | None  | None  |
| TTR         | transthyretin                                   | NG_009490         | None                  | None    | None | None  | None  |
| LMNA        | lamin A/C                                       | NG_008692         | None                  | None    | None | None  | None  |
| DES         | desmin                                          | NG_008043         | None                  | None    | None | None  | None  |
| LDB3        | LIM domain binding 3 (ZASP)                     | NG_008876         | None                  | None    | None | None  | None  |
| TAZ         | tafazzin                                        | NG_009634         | None                  | None    | None | None  | None  |
| PLN         | phospholamban                                   | NG_009082         | None                  | None    | None | None  | None  |

|         |                                                                      |                 |      |      |       |      |      |
|---------|----------------------------------------------------------------------|-----------------|------|------|-------|------|------|
| TTR     | transthyretin                                                        | NG_009490       | None | None | None  | None | None |
| LAMP2   | lysosomal-associated membrane protein 2                              | NG_007995       | None | None | None  | None | None |
| SGCD    | delta sarcoglycan                                                    | NG_008693       | None | None | None  | None | None |
| MTTL1   | mitochondrially encoded tRNAleucine 1                                | NC_012920_TRNL1 | None | None | None  | None | None |
| MTTQ    | mitochondrially encoded tRNA glutamine                               | NC_012920_TRNQ  | None | None | None  | None | None |
| MTHH    | mitochondrially encoded tRNAhistidine                                | NC_012920_TRNH  | None | None | None  | None | None |
| MTTK    | mitochondrially encoded tRNA lysine                                  | NC_012920_TRNK  | None | None | None  | None | None |
| MTTS1   | mitochondrially encoded tRNA serine 1                                | NC_012920_TRNS1 | None | None | None  | None | None |
| MTTS2   | mitochondrially encoded tRNA serine 1                                | NC_012920_TRNS2 | None | None | None  | None | None |
| MTND1   | mitochondrially encoded NADH dehydrogenase 1                         | NC_012920_ND1   | None | None | None  | None | None |
| MTND5   | mitochondrially encoded NADH dehydrogenase 5                         | NC_012920_ND5   | None | None | None  | None | None |
| MTND6   | mitochondrially encoded NADH dehydrogenase 6                         | NC_012920_ND6   | None | None | None  | None | None |
| KCNQ1   | potassium voltage-gated channel, KQT-like subfamily, member 1        | NC_000011.9     | None | None | G269S | None | None |
| KCNH2   | potassium voltage-gated channel, subfamily H (eag-related), member 2 | NC_000007.13    | None | None | None  | None | None |
| SCN5A   | sodium channel, voltage-gated, type V, alpha subunit                 | NC_000003.11    | None | None | None  | None | None |
| ANK2    | ankyrin 2, neuronal                                                  | NC_000004.11    | None | None | None  | None | None |
| KCNE1   | potassium voltage-gated channel, Isk-related family, member 1        | NC_000021.8     | None | None | None  | None | None |
| KCNE2   | potassium voltage-gated channel, Isk-related family, member 2        | NC_000021.8     | None | None | None  | None | None |
| KCNJ2   | potassium inwardly-rectifying channel, subfamily J, member 2         | NC_000017.10    | None | None | None  | None | None |
| CACNA1C | calcium channel, voltage-dependent, L type, alpha 1C subunit         | NC_000012.11    | None | None | None  | None | None |
| CAV3    | caveolin 3                                                           | NC_000003.11    | None | None | None  | None | None |
| SCN4B   | sodium channel, voltage-gated, type IV, beta subunit                 | NC_000011.9     | None | None | None  | None | None |
| AKAP9   | A kinase (PRKA) anchor protein (yotiao) 9                            | NC_000007.13    | None | None | None  | None | None |
| SNTA1   | syntrophin, alpha 1                                                  | NC_000020.10    | None | None | None  | None | None |
| KCNJ5   | potassium inwardly-rectifying channel, subfamily J, member 5         | NC_000011.9     | None | None | None  | None | None |

**Supplemental Table 3. Panel of cardiac ion channel-related transcripts used for quantitative RT- PCR**

|    | <b>Gene</b> | <b>ASSAY ID</b> | <b>Gene description</b>                                                       |
|----|-------------|-----------------|-------------------------------------------------------------------------------|
| 1  | GADPH       | Hs99999905_m1   | Glyceraldehyde-3-phosphate dehydrogenase                                      |
| 2  | SCN5A       | Hs00165693_m1   | Nav1.5                                                                        |
| 3  | KCND3       | Hs00542597_m1   | Kv4.3 (I <sub>to</sub> )                                                      |
| 4  | CACNA1C     | Hs00167681_m1   | Ca <sub>v</sub> 1.2                                                           |
| 5  | KCNH2       | Hs04234270_g1   | Kv11.1 (hERG/I <sub>kr</sub> )                                                |
| 6  | KCNQ1       | Hs00923522_m1   | Kv7.1, $\alpha$ -subunit of I <sub>ks</sub>                                   |
| 7  | KCNA5       | Hs00266898_s1   | Kv1.5                                                                         |
| 8  | HCN2        | Hs00606903_m1   | Hyperpolarization-activated cyclic nucleotide-gated channel (I <sub>f</sub> ) |
| 9  | HCN4        | Hs00175760_m1   | Hyperpolarization-activated cyclic nucleotide-gated channel (I <sub>f</sub> ) |
| 10 | KCNJ2       | Hs00265315_m1   | Inward rectifier K <sup>+</sup> channel Kir2.1                                |
| 11 | KCNJ3       | Hs01002552_m1   | Inward rectifier K <sup>+</sup> channel Kir3.1                                |
| 12 | KCNJ5       | Hs00942581_m1   | Inward rectifier K <sup>+</sup> channel Kir3.4                                |
| 13 | KCNJ11      | 02625248_s1     | ATP-sensitive inward rectifier K <sup>+</sup> channel Kir6.2                  |
| 14 | KCNE1       | Hs00897540_s1   | minK, $\beta$ -subunit of I <sub>ks</sub>                                     |
| 15 | KCHIP2      | Hs01552688_g1   | $\beta$ -subunit of I <sub>to</sub>                                           |

**Supplemental Table 4. Summary of action potential parameters in hESC-CMs and hiPSC-CMs**

|                         | % of cells | Beating rate<br>(bpm) | MDP<br>(mV) | Overshoot<br>(mV) | APA<br>(mV) | APD <sub>50</sub><br>(ms)   | APD <sub>70</sub><br>(ms)   | APD <sub>90</sub><br>(ms)   | V <sub>max</sub><br>(V / s) |
|-------------------------|------------|-----------------------|-------------|-------------------|-------------|-----------------------------|-----------------------------|-----------------------------|-----------------------------|
| <b>hESC-CMs</b>         |            |                       |             |                   |             |                             |                             |                             |                             |
| Nodal-like              | 5          | 97 ± 12               | -38.7 ± 2.8 | 32.4 ± 0.7        | 71.2 ± 1.7  | 142.5 ± 12.3                | 190.3 ± 16.7                | 242.7 ± 24.6                | 3.3 ± 0.6                   |
| Atrial-like             | 27         | 68 ± 5                | -53.3 ± 1.0 | 45.6 ± 1.2        | 97.3 ± 1.3  | 178.6 ± 10.0                | 231.0 ± 10.4                | 298.5 ± 33.8                | 33.5 ± 8.7                  |
| Ventricular-like        | 68         | 48 ± 5                | -57.2 ± 1.3 | 46.2 ± 2.3        | 101.1 ± 1.3 | 310.0 ± 14.2                | 320.6 ± 20.3                | 340.8 ± 38.7                | 25.1 ± 9.1                  |
| <b>Normal hiPSC-CMs</b> |            |                       |             |                   |             |                             |                             |                             |                             |
| Nodal-like              | 8          | 75 ± 8                | -34.3 ± 3.5 | 30.6 ± 1.1        | 65.1 ± 0.9  | 104.4 ± 20.2                | 204.7 ± 12.5                | 288.1 ± 25.5                | 3.4 ± 0.8                   |
| Atrial-like             | 29         | 48 ± 7                | -47.2 ± 1.3 | 44.3 ± 1.8        | 90.7 ± 2.9  | 172.2 ± 12.3                | 220.4 ± 22.8                | 293.6 ± 20.3                | 28.9 ± 7.3                  |
| Ventricular-like        | 63         | 54 ± 9                | -52.6 ± 0.7 | 46.0 ± 1.0        | 97.2 ± 1.3  | 326.4 ± 26.9                | 340.5 ± 14.6                | 370.2 ± 32.4                | 27.7 ± 5.3                  |
| <b>LQT hiPSC-CMs</b>    |            |                       |             |                   |             |                             |                             |                             |                             |
| Nodal-like              | 7          | 101 ± 11              | -42.1 ± 1.7 | 29.9 ± 2.1        | 73.7 ± 4.1  | 187.6 ± 12.8                | 231.5 ± 17.5                | 283.0 ± 24.7                | 3.1 ± 0.4                   |
| Atrial-like             | 33         | 80 ± 9                | -54.1 ± 1.3 | 48.4 ± 1.5        | 102.7 ± 4.7 | 416.3 ± 30.7 <sup>***</sup> | 467.3 ± 30.5 <sup>***</sup> | 514.7 ± 28.5 <sup>***</sup> | 31.1 ± 6.6                  |
| Ventricular-like        | 60         | 58 ± 4                | -59.3 ± 0.8 | 50.0 ± 1.1        | 109.3 ± 1.8 | 821.5 ± 47.2 <sup>***</sup> | 839.4 ± 50.2 <sup>***</sup> | 884.2 ± 48.2 <sup>***</sup> | 25.9 ± 5.0                  |
| <b>HCM hiPSC-CMs</b>    |            |                       |             |                   |             |                             |                             |                             |                             |
| Nodal-like              | 5          | 82 ± 7                | -31.9 ± 2.1 | 31.0 ± 2.2        | 61.6 ± 4.0  | 173.1 ± 21.2                | 213.8 ± 15.4                | 265.9 ± 25.5                | 2.1 ± 0.6                   |
| Atrial-like             | 28         | 63 ± 5                | -52.7 ± 1.7 | 44.6 ± 1.1        | 97.5 ± 0.9  | 170.5 ± 11.8                | 217.7 ± 31.6                | 346.3 ± 40.5                | 30.4 ± 8.6                  |
| Ventricular-like        | 67         | 50 ± 2                | -54.9 ± 0.7 | 48.8 ± 0.7        | 103.0 ± 1.0 | 374.5 ± 16.7                | 408.2 ± 21.5                | 426.1 ± 17.6                | 27.9 ± 7.9                  |
| <b>DCM hiPSC-CMs</b>    |            |                       |             |                   |             |                             |                             |                             |                             |
| Nodal-like              | 5          | 68 ± 15               | -31.8 ± 2.3 | 30.7 ± 1.5        | 62.5 ± 1.4  | 169.6 ± 16.5                | 192.4 ± 21.8                | 240.8 ± 31.6                | 2.3 ± 1.1                   |
| Atrial-like             | 27         | 64 ± 11               | -48.7 ± 3.7 | 42.5 ± 2.7        | 91.4 ± 2.2  | 176.2 ± 14.0                | 222.6 ± 25.4                | 278.8 ± 26.3                | 23.3 ± 8.1                  |
| Ventricular-like        | 68         | 59 ± 9                | -54.8 ± 1.6 | 49.4 ± 1.1        | 104.2 ± 1.7 | 381.1 ± 30.2                | 415.5 ± 31.4                | 435.8 ± 35.4                | 23.4 ± 7.9                  |

**Supplemental Table 5. Summary of drug-induced hERG tail current inhibition on HEK293 cells**

|            | Dose<br>( $\mu\text{M}$ ) | Inhibition of hERG Current<br>( $\Delta\%$ ) | $\text{IC}_{50}$<br>( $\mu\text{M}$ ) |
|------------|---------------------------|----------------------------------------------|---------------------------------------|
| Cisapride  | 0.001                     | 8.0 $\pm$ 4.0                                | 0.032 $\pm$ 0.003                     |
|            | 0.01                      | 25.0 $\pm$ 3.0                               |                                       |
|            | 0.03                      | 50.0 $\pm$ 5.0                               |                                       |
|            | 0.1                       | 90.0 $\pm$ 5.0                               |                                       |
|            | 0.3                       | 97.7 $\pm$ 3.0                               |                                       |
|            | 1                         | 99.2 $\pm$ 8.0                               |                                       |
| Nicorandil | 0.1                       | 3.0 $\pm$ 3.2                                | >100                                  |
|            | 1                         | -5.4 $\pm$ 4.2                               |                                       |
|            | 10                        | 6.2 $\pm$ 6.3                                |                                       |
|            | 100                       | 10.7 $\pm$ 5.4                               |                                       |
| Verapamil  | 0.01                      | 4.4 $\pm$ 1.0                                | 0.194 $\pm$ 0.050                     |
|            | 0.1                       | 37.7 $\pm$ 3.0                               |                                       |
|            | 0.3                       | 55.0 $\pm$ 5.0                               |                                       |
|            | 1                         | 89.4 $\pm$ 2.0                               |                                       |
|            | 10                        | 96.2 $\pm$ 0.4                               |                                       |
|            | 100                       | 98.8 $\pm$ 0.3                               |                                       |
| Alfuzosin  | 0.1                       | 6.0 $\pm$ 5.0                                | 11.34 $\pm$ 0.72                      |
|            | 1                         | 10.0 $\pm$ 5.0                               |                                       |
|            | 3                         | 16.0 $\pm$ 7.0                               |                                       |
|            | 10                        | 47.0 $\pm$ 10.0                              |                                       |
|            | 30                        | 92.0 $\pm$ 0.6                               |                                       |



**Supplemental Table 6. Summary of drug-induced effects on action potentials**

|            | hESC-CMs (H9)      |                                     | Control hiPSC-CMs  |                                     | LQT hiPSC-CMs      |                                     | HCM hiPSC-CMs      |                                     | DCM hiPSC-CMs      |                                     |
|------------|--------------------|-------------------------------------|--------------------|-------------------------------------|--------------------|-------------------------------------|--------------------|-------------------------------------|--------------------|-------------------------------------|
|            | Dose<br>( $\mu$ M) | APD <sub>90</sub><br>( $\Delta\%$ ) | Dose<br>( $\mu$ M) | APD <sub>90</sub><br>( $\Delta\%$ ) | Dose<br>( $\mu$ M) | APD <sub>90</sub><br>( $\Delta\%$ ) | Dose<br>( $\mu$ M) | APD <sub>90</sub><br>( $\Delta\%$ ) | Dose<br>( $\mu$ M) | APD <sub>90</sub><br>( $\Delta\%$ ) |
| Cisapride  | 0.001              | 4.0 $\pm$ 0.3                       | 0.001              | 2.6 $\pm$ 0.4                       | 0.001              | 6.7 $\pm$ 2.0                       | 0.001              | 7.5 $\pm$ 1.1*                      | 0.001              | 5.0 $\pm$ 0.6                       |
|            | 0.003              | 8.4 $\pm$ 1.2                       | 0.003              | 7.9 $\pm$ 1.1                       | 0.003              | 27.0 $\pm$ 5.0**                    | 0.003              | 36.0 $\pm$ 5.8**                    | 0.003              | 15.0 $\pm$ 2.9                      |
|            | 0.01               | 32.0 $\pm$ 5.0                      | 0.01               | 30.5 $\pm$ 5.4                      | 0.01               | 50.0 $\pm$ 5.0*                     | 0.01               | 58.8 $\pm$ 6.9**                    | 0.01               | 40.0 $\pm$ 3.4                      |
|            | 0.03               | 75.0 $\pm$ 2.2                      | 0.03               | 77.3 $\pm$ 2.6                      | 0.03               | 88.0 $\pm$ 6.0/EAD*                 | 0.03               | 100.0 $\pm$ 10.0/EAD**              | 0.03               | 70.0 $\pm$ 4.6                      |
|            | 0.1                | 120.0 $\pm$ 10.0                    | 0.1                | 125.0 $\pm$ 18.8                    | 0.1                | EAD                                 | 0.1                | EAD                                 | 0.1                | 150.0 $\pm$ 18.8                    |
|            | 0.3                | EAD                                 |
| Nicorandil | 0.001              | -5.7 $\pm$ 2.9                      | 0.001              | -5.7 $\pm$ 2.9                      | 0.001              | -                                   | 0.001              | -                                   | 0.001              | -                                   |
|            | 0.01               | -7.0 $\pm$ 5.8                      | 0.01               | -7.0 $\pm$ 5.8                      | 0.01               | -10.8 $\pm$ 7.0                     | 0.01               | -8.2 $\pm$ 8.1                      | 0.01               | -10.0 $\pm$ 5.8                     |
|            | 0.1                | -13.0 $\pm$ 5.8                     | 0.1                | -10.0 $\pm$ 5.8                     | 0.1                | -25.3 $\pm$ 8.0**                   | 0.1                | -15.0 $\pm$ 11.5                    | 0.1                | -20.3 $\pm$ 5.8**                   |
|            | 0.3                | -20.0 $\pm$ 6.9                     | 0.3                | -17.0 $\pm$ 6.9                     | 0.3                | -                                   | 0.3                | -                                   | 0.3                | -                                   |
|            | 1                  | -23.8 $\pm$ 7.5                     | 1                  | -25.0 $\pm$ 7.5                     | 1                  | -36.2 $\pm$ 12.0**                  | 1                  | -28.0 $\pm$ 5.8                     | 1                  | -22.7 $\pm$ 7.5                     |
|            | 10                 | -51.7 $\pm$ 11.5                    | 10                 | -48.4 $\pm$ 11.5                    | 10                 | -71.6 $\pm$ 10.0**                  | 10                 | -51.0 $\pm$ 11.5                    | 10                 | -61.0 $\pm$ 11.5*                   |
| Verapamil  | 0.1                | 5.0 $\pm$ 8.7                       | 0.1                | 2.5 $\pm$ 5.8                       |                    |                                     | -                  | -                                   | -                  | -                                   |
|            | 1                  | 7.0 $\pm$ 7.5                       | 1                  | 5.0 $\pm$ 8.7                       |                    |                                     | -                  | -                                   | -                  | -                                   |
|            | 3                  | 10.0 $\pm$ 8.0                      | 3                  | 10.0 $\pm$ 7.0                      |                    |                                     | -                  | -                                   | -                  | -                                   |
|            | 10                 | 26.0 $\pm$ 6.4                      | 10                 | 25.3 $\pm$ 5.8                      |                    |                                     | -                  | -                                   | -                  | -                                   |
|            | 30                 | 27.0 $\pm$ 8.0                      | 30                 | 25.8 $\pm$ 10.0                     |                    |                                     | -                  | -                                   | -                  | -                                   |
| Alfuzosin  | 0.1                | 0.3 $\pm$ 1.2                       | 0.1                | -1.4 $\pm$ 4.6                      |                    |                                     | -                  | -                                   | -                  | -                                   |
|            | 0.3                | 3.2 $\pm$ 4.1                       | 0.3                | 4.1 $\pm$ 5.2                       |                    |                                     | -                  | -                                   | -                  | -                                   |
|            | 1                  | 14.2 $\pm$ 6.7                      | 1                  | 18.9 $\pm$ 5.8                      |                    |                                     | -                  | -                                   | -                  | -                                   |
|            | 3                  | 22.9 $\pm$ 5.3                      | 3                  | 25.8 $\pm$ 6.9                      |                    |                                     | -                  | -                                   | -                  | -                                   |
|            | 10                 | 26.8 $\pm$ 9.4                      | 10                 | 27.2 $\pm$ 8.7                      |                    |                                     | -                  | -                                   | -                  | -                                   |

Quantitative data are presented as mean  $\pm$  s.e.m.. Comparison between the groups was performed by one-way analysis of variance (ANOVA), followed by the Dunnett test (for comparison of all groups to control hiPSC-CMs). \* indicates  $P$  value of  $<0.05$ , \*\* indicates  $P$  value of  $<0.01$

**Supplemental Table 7. Panel of drugs used for drug screening on hESC-CMs and patient-specific hiPSC-CMs**

| Tested drugs | Phase target | Ion channel target                                    | Current target                     | IC <sub>50</sub> of hERG current inhibition (μM) | IC <sub>50</sub> of APD prolongation/shortening (μM) |               |               |               |
|--------------|--------------|-------------------------------------------------------|------------------------------------|--------------------------------------------------|------------------------------------------------------|---------------|---------------|---------------|
|              |              |                                                       |                                    |                                                  | Control hiPSC-CMs                                    | LQT-CMs       | HCM-CMs       | DCM-CMs       |
| Cisapride    | 2, 3         | hERG blocker                                          | I <sub>Kr</sub>                    | 0.032 ± 0.003                                    | 0.035 ± 0.004                                        | 0.015 ± 0.007 | 0.014 ± 0.005 | 0.033 ± 0.006 |
| Nicorandil   | 3            | K-ATP channel opener                                  | I <sub>Ks</sub>                    | >100                                             | 13.44 ± 2.1                                          | 3.44 ± 1.11   | 11.45 ± 2.3   | 8.32 ± 1.35   |
| Verapamil    | 2, 3         | L-type Ca <sup>2+</sup> channel blocker, hERG blocker | I <sub>Ca</sub><br>I <sub>Kr</sub> | 0.194 ± 0.05                                     | 5.18 ± 2.6                                           | -             | -             | -             |
| Alfuzosin    | 1            | Sodium channel (Na <sub>v</sub> 1.5) opener           | I <sub>Na</sub>                    | 11.34 ± 0.72                                     | 2.12 ± 0.93                                          | -             | -             | -             |
